# Supplementary material for: Internal hydrogen bonding in tetrahedral and trigonal bipyramidal zinc(ii) complexes of pyridine-based ligands
Source: Royal Society of Chemistry journal article supplement (doi:10.1039/b305476b), 2003-01-01
Supplement: b305476b.pdf [file b305476b.pdf]

**SUPPORTING INFORMATION FOR:**

**Internal hydrogen bonding in tetrahedral and trigonal bipyramidal zinc(II) complexes of pyridine-based ligands**

**Juan C. Mareque Rivas, Emiliano Salvagni, Rafael Torres Martín de Rosales and Simon Parsons**

*School of Chemistry, The University of Edinburgh, Edinburgh, UK EH9 3JJ. Fax: 44 (0)131 6504743; Tel: 44 (0)131 650 4761; Email:juan.mareque@ed.ac.uk.*

---

**Figure captions**

**Fig. S1** Histogram of the H $\cdots$ X (X = centroid of a phenyl ring) distances found for very short N-H $\cdots$ X (X = centroid of a phenyl ring) H-bonds in organic systems.

**Fig. S2** Histogram of the H $\cdots$ X (X = centroid of a phenyl ring) distances found for very short N-H $\cdots$ X (X = centroid of a phenyl ring) H-bonds in metal complexes.

**Fig. S3**  $^1\text{H}$  VT NMR of  $[(\text{L}^2)\text{Zn}(\text{Cl})](\text{Cl})$  **2'** in  $\text{CD}_3\text{CN}$  (28 mM) showing aromatic and  $\text{NH}_2$  (\*) resonances. See Table 7 and compare with Figs. 6, S4-S9.

**Fig. S4**  $^1\text{H}$  VT NMR of  $[(\text{L}^2)\text{Zn}(\text{Cl})](\text{Cl})$  **2'** in  $\text{CD}_3\text{CN}$  (14 mM) showing aromatic and  $\text{NH}_2$  (\*) resonances. See Table 7 and compare with Figs. 6, S3-S9.

**Fig. S5**  $^1\text{H}$  VT NMR of  $[(\text{L}^2)\text{Zn}(\text{Cl})](\text{Cl})$  **2'** in  $\text{CD}_3\text{CN}$  (7 mM) showing aromatic and  $\text{NH}_2$  (\*) resonances. See Table 7 and compare with Figs. 6, S3-S9.

**Fig. S6**  $^1\text{H}$  VT NMR of  $[(\text{L}^2)\text{Zn}(\text{Cl})](\text{Cl})$  **2'** in  $\text{CD}_3\text{CN}$  (3.5 mM) showing aromatic and  $\text{NH}_2$  (\*) resonances. See Table 7 and compare with Figs. 6, S3-S9.

**Fig. S7**  $^1\text{H}$  VT NMR of  $[(\text{L}^2)\text{Zn}(\text{Cl})](\text{BPh}_4)$  **2** in  $\text{CD}_3\text{CN}$  (28 mM) showing aromatic and  $\text{NH}_2$  (\*) resonances. See Table 7 and compare with Figs. 6, S3-S9.

**Fig. S8**  $^1\text{H}$  VT NMR of  $[(\text{L}^2)\text{Zn}(\text{Cl})](\text{BPh}_4)$  **2** in  $\text{CD}_3\text{CN}$  (7 mM) showing aromatic and  $\text{NH}_2$  (\*) resonances. See Table 7 and compare with Figs. 6, S3-S9.

**Fig. S9**  $^1\text{H}$  VT NMR of  $[(\text{L}^2)\text{Zn}(\text{Cl})](\text{BPh}_4)$  **2** in  $\text{CD}_3\text{CN}$  (1.8 mM) showing aromatic and  $\text{NH}_2$  (\*) resonances. See Table 7 and compare with Figs. 6, S3-S8.

**Fig. S10** Temperature and concentration dependency of the  $\text{NH}_2$  chemical shift in the  $^1\text{H}$  NMR spectra of **2'**. See Table 7 and compare with Fig. S11.

**Fig. S11** Temperature and concentration dependency of the  $\text{NH}_2$  chemical shift in the  $^1\text{H}$  NMR spectra of **2**. See Table 7 and compare with Fig S10.

## Cambridge Structural Database Search.

Evidence of various types of O-H $\cdots$ C and N-H $\cdots$ C hydrogen bonding in crystalline alkynes, alkenes and aromatics has been reported elsewhere.<sup>1</sup> In this report the generality of only very short N-H $\cdots$  $\pi$  (phenyl, centroid type) hydrogen bonds was investigated searching the 5.24 (November 2002) version of the Cambridge Structural Database (CSD). Only error-free, non-disordered structures with  $R < 0.1$  were accepted. The N-H distance was normalised to 1.01 Å and the H $\cdots$ X (X = centroid of a phenyl ring) distance was specified to lie between 0 and 3 Å and the N-H $\cdots$ X angle to be calculated. A total of 41 structures satisfied our arbitrary criteria of very short N-H $\cdots$ X hydrogen bond, H $\cdots$ X < 2.3 Å (Table S1). These crystal structures were scrutinised and separated into organic (27 structures) and inorganic (14 structures). The focus of this search was on investigating what causes very short external N-H $\cdots$  $\pi$  (phenyl, centroid type) hydrogen bonding in metal complexes compared to organic compounds. Thus, in organic compounds this structural feature is most commonly found (24 of 27 cases) when a R<sub>3</sub>N-H<sup>+</sup> group is the hydrogen bond donor. By contrast, in metal complexes the majority (8 of 14) of short N-H $\cdots$  $\pi$  (phenyl, centroid type) hydrogen bonds involved a RNH<sub>2</sub>-M fragment as the H-bond donor (M = strongly Lewis acidic metal). See text for interpretation of this CSD search. Histograms for the H $\cdots$ X distances (X = centroid of the phenyl ring) are given below (Figs. S1 and S2).

## References:

1. M. A. Viswamitra, R. Radhakrishnam, J. Bandekar and G. R. Desiraju, *J. Am. Chem. Soc.*, 1993, **115**, 4868.

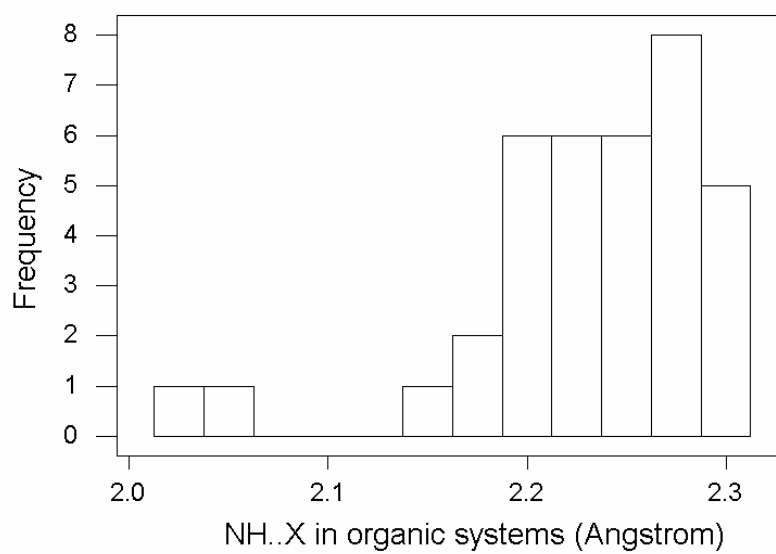

**Fig. S1** Mareque Rivas, Salvagni, Torres and Parsons.

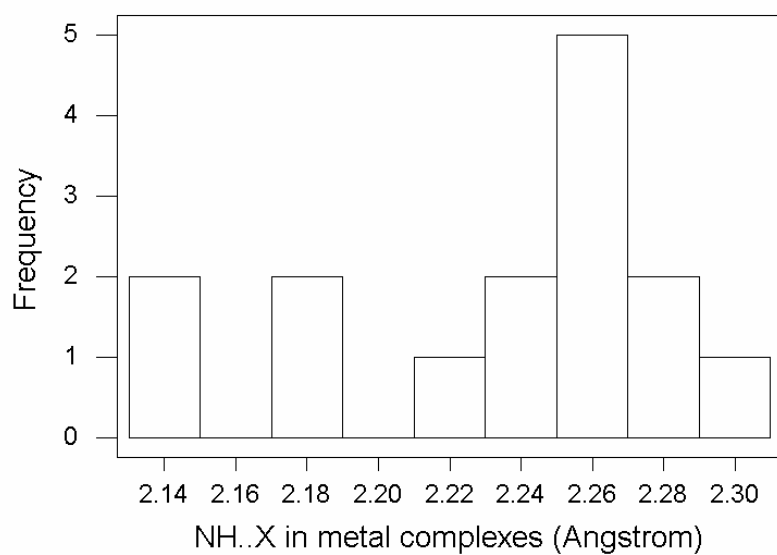

**Fig. S2** Mareque Rivas, Salvagni, Torres and Parsons.

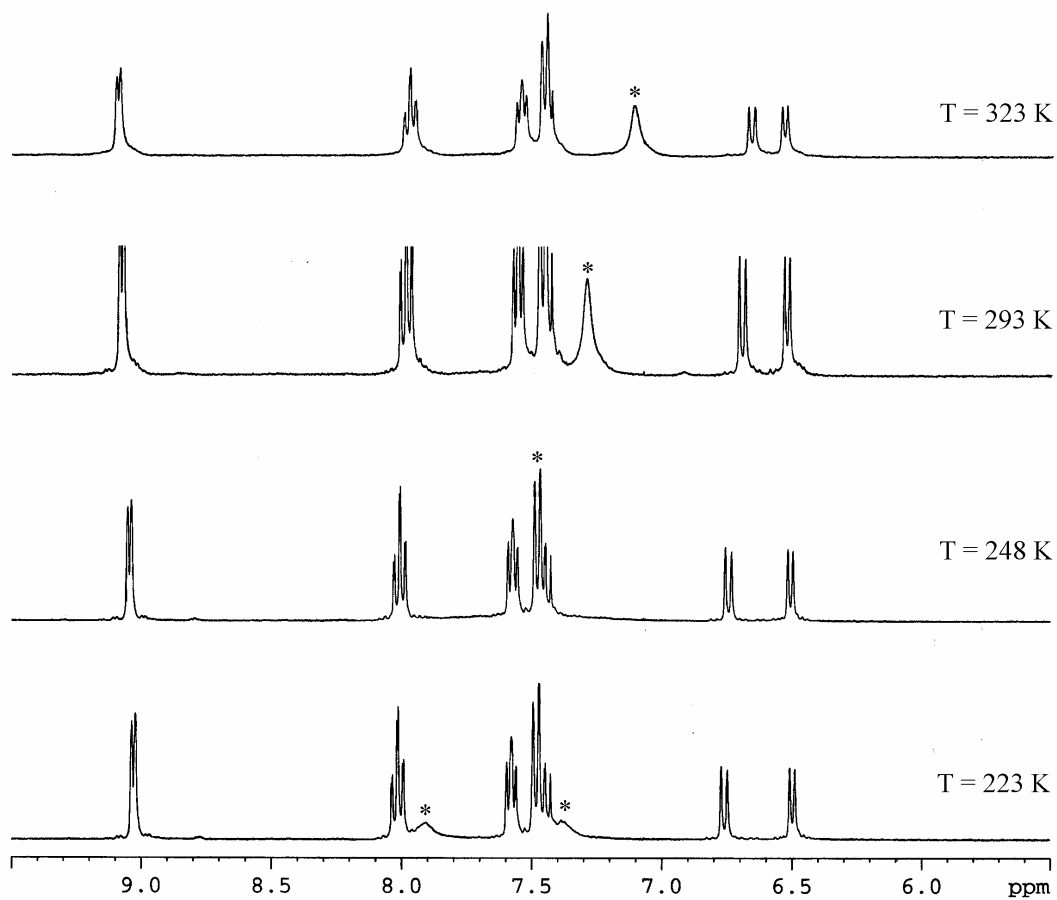

**Fig. S3** Mareque Rivas, Salvagni, Torres and Parsons.

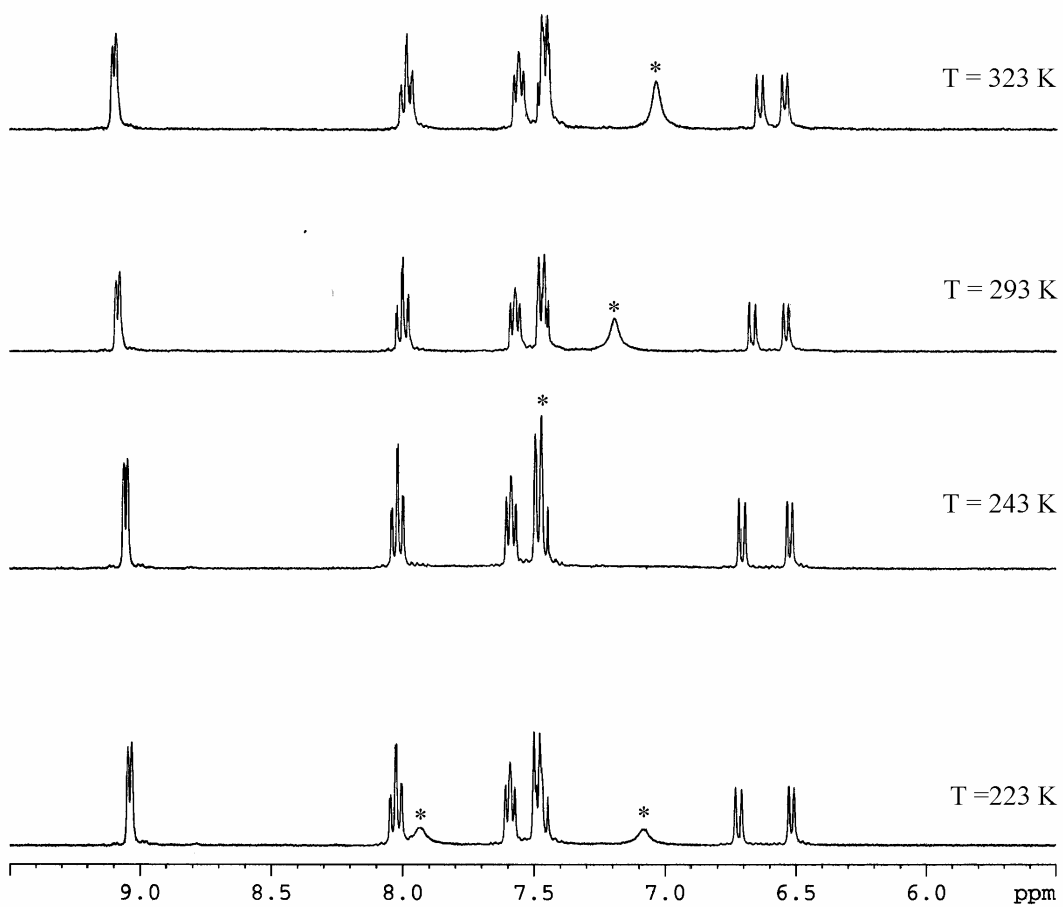

**Fig. S4** Mareque Rivas, Salvagni, Torres and Parsons.

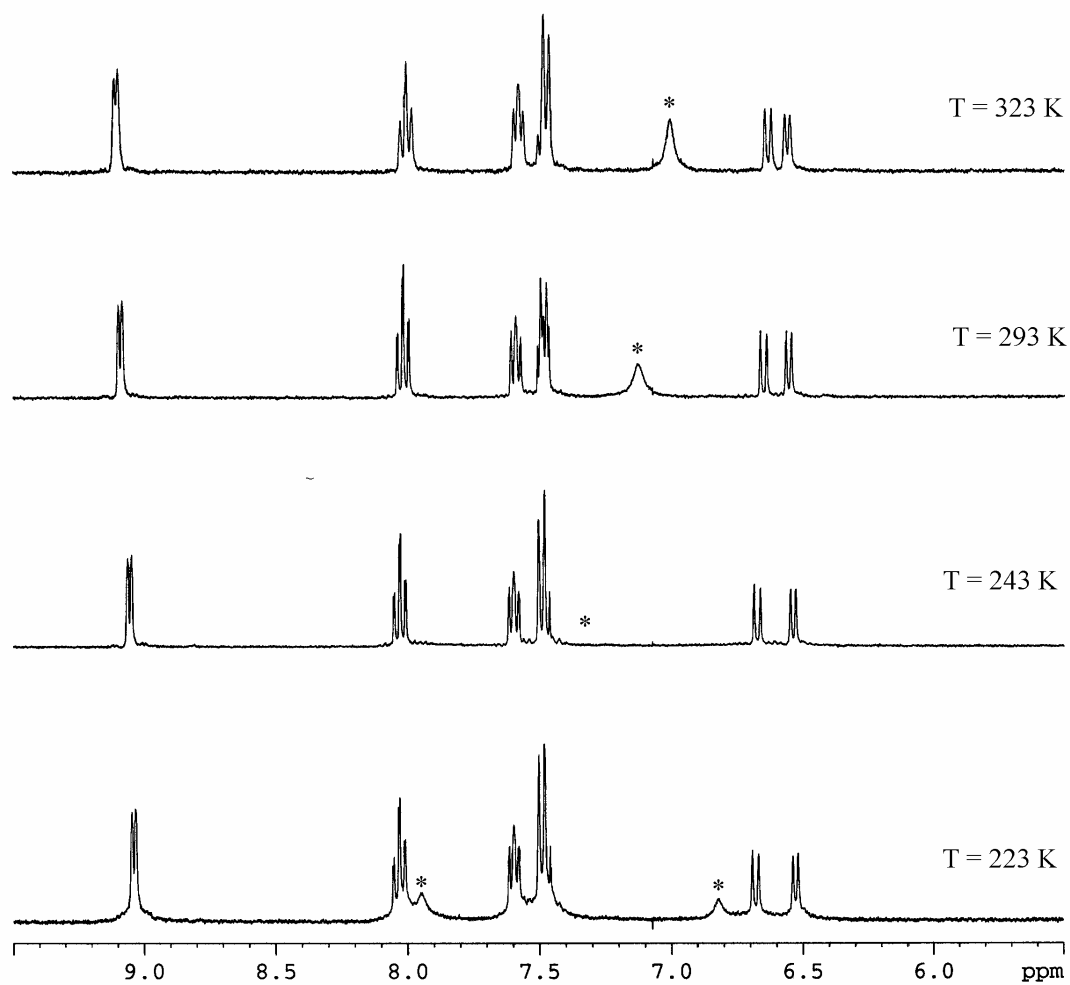

**Fig. S5** Mareque Rivas, Salvagni, Torres and Parsons.



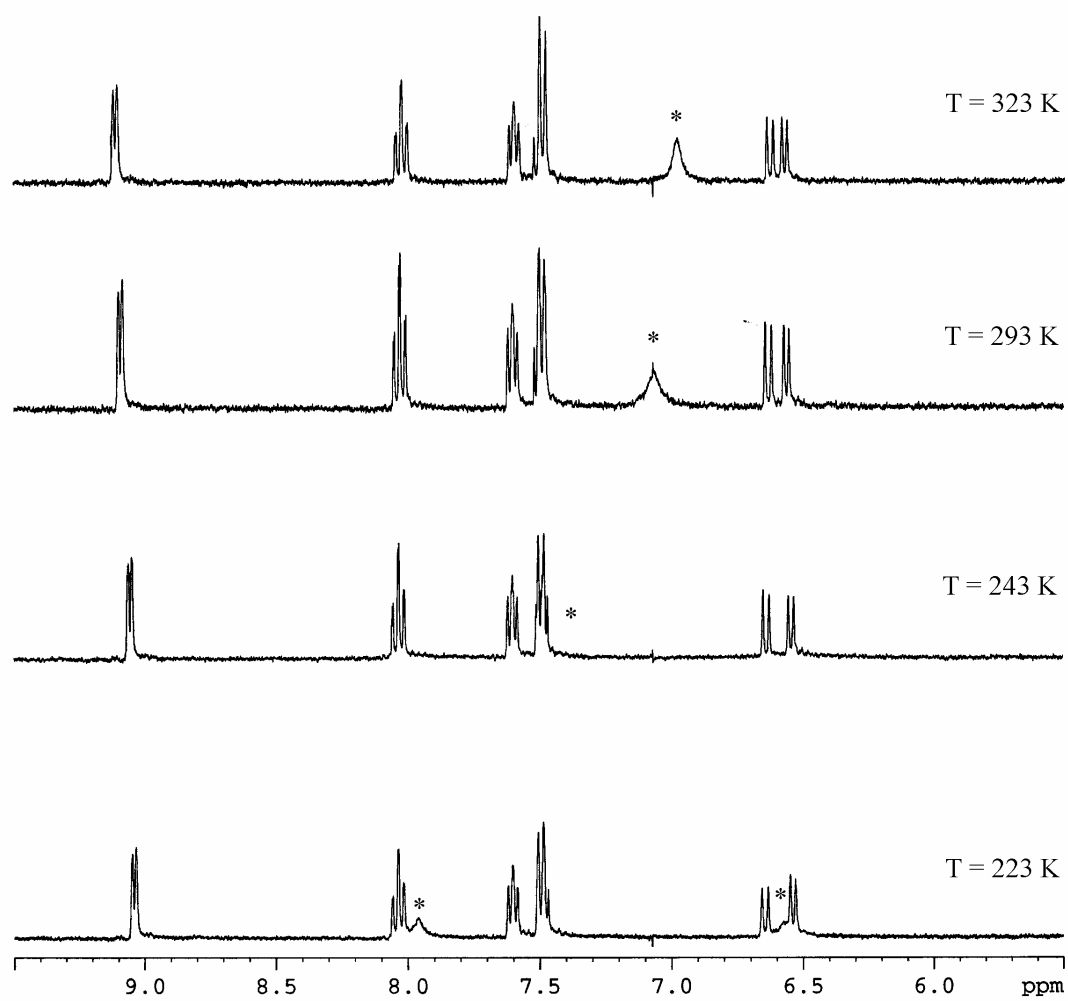

**Fig. S6** Mareque Rivas, Salvagni, Torres and Parsons.

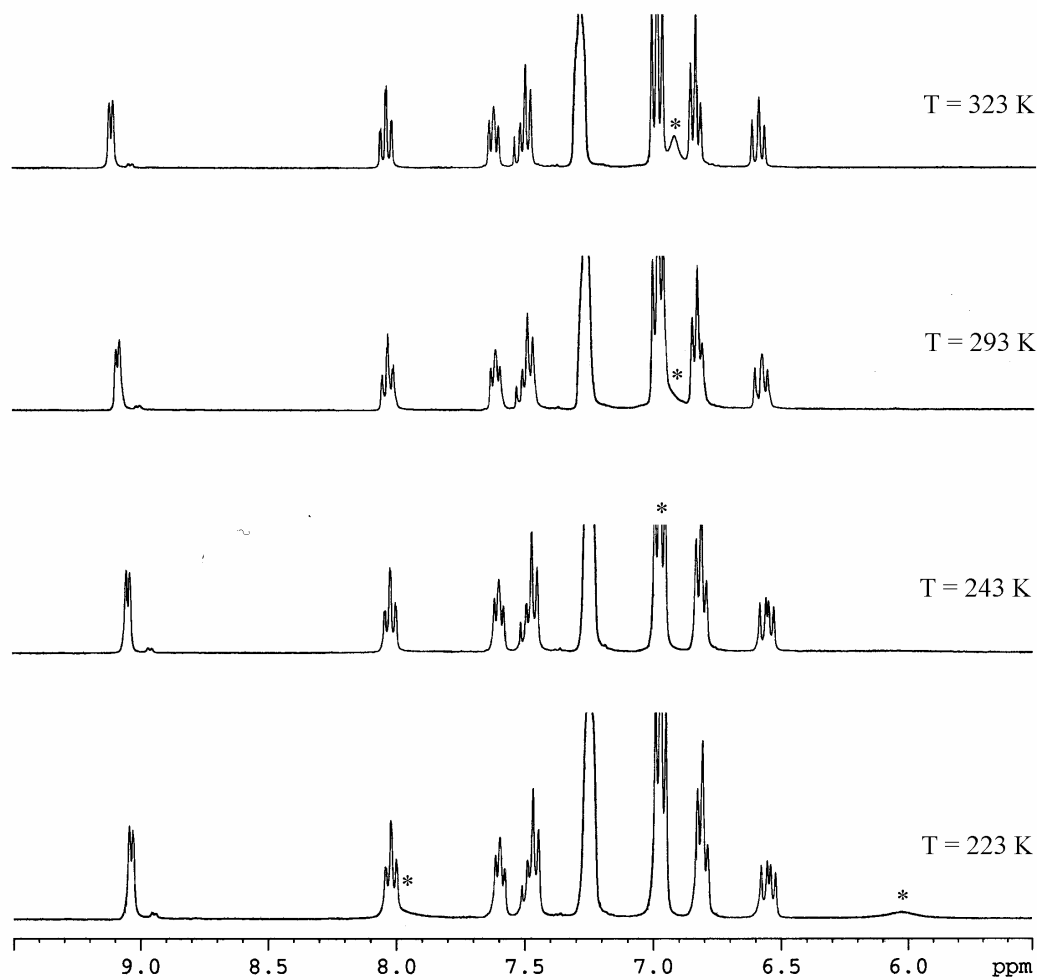

**Fig. S7** Mareque Rivas, Salvagni, Torres and Parsons.

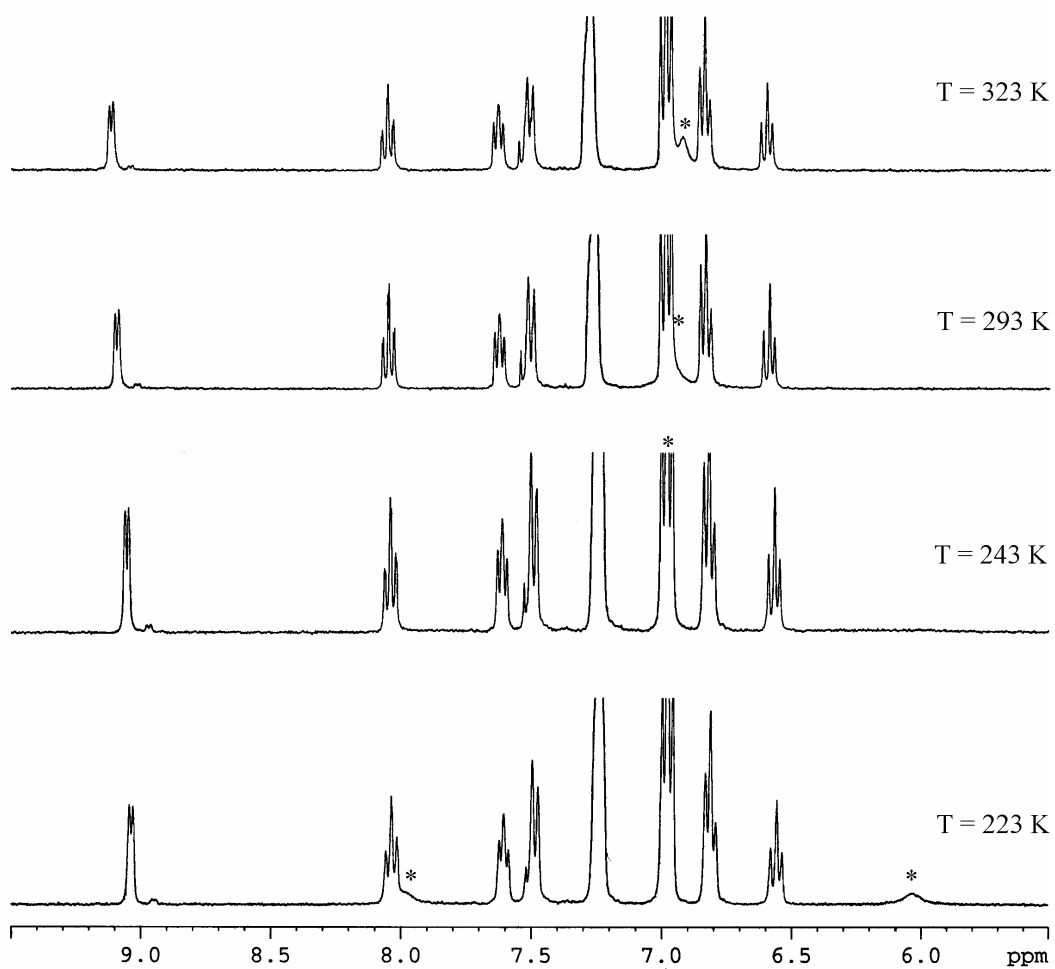

**Fig. S8** Mareque Rivas, Salvagni, Torres and Parsons.

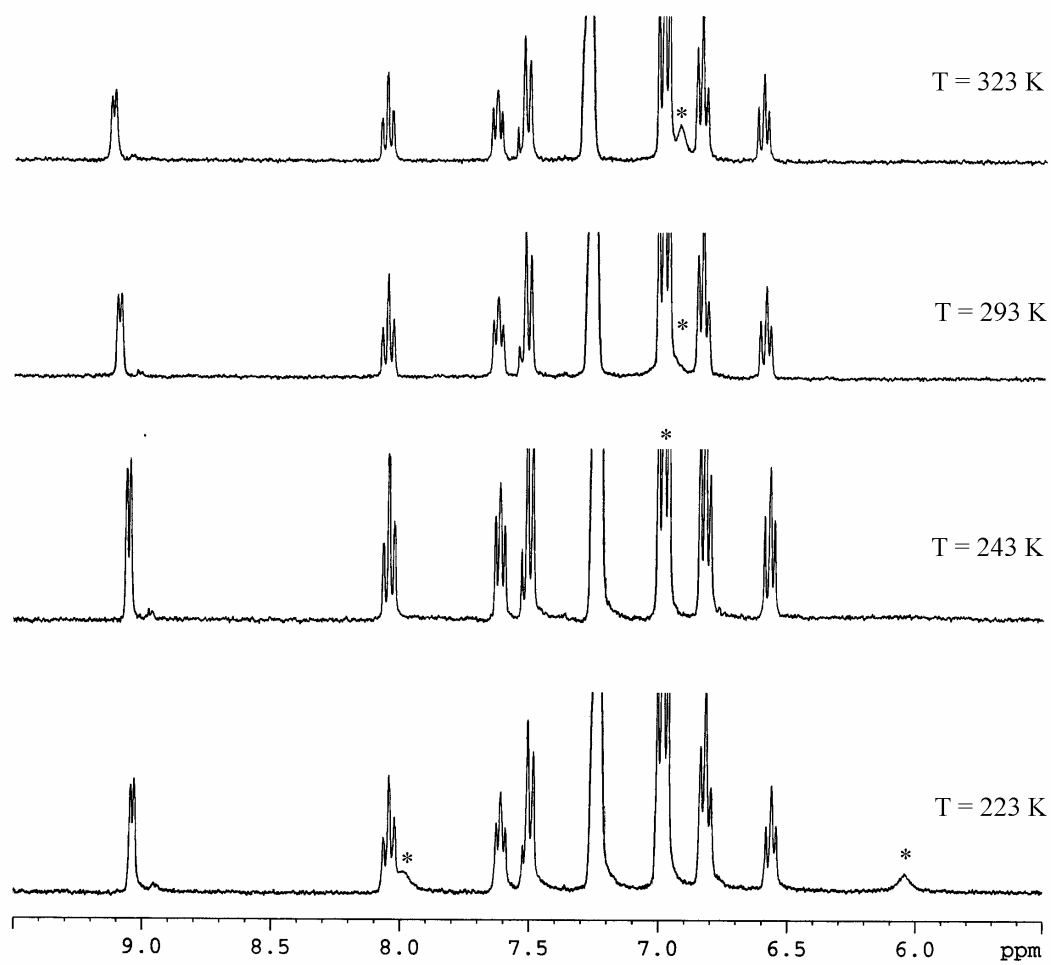

**Fig. S9** Mareque Rivas, Salvagni, Torres and Parsons.

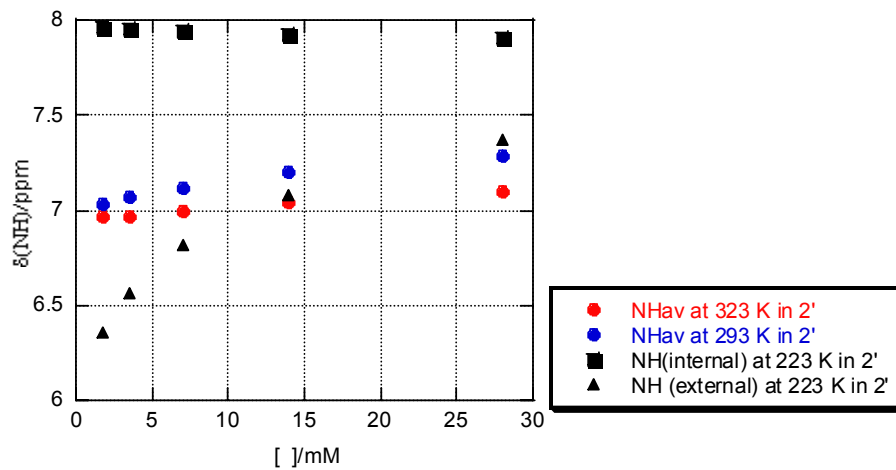

**Fig. S10** Mareque Rivas, Salvagni, Torres and Parsons.

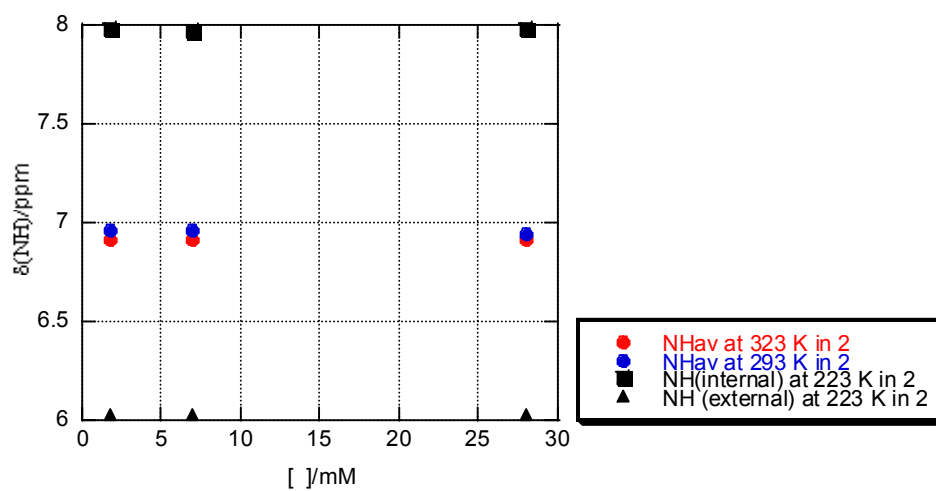

**Fig. S11** Mareque Rivas, Salvagni, Torres and Parsons.

**Table S1** Refcodes, distances and angles of (i) organic and (ii) inorganic crystal structures with very short N-H...X (X = centroid of a phenyl ring ) H-bonds found searching the CSD (5.24 version).

(i)

|          | N-H...X/° | H...X/Å |
|----------|-----------|---------|
| ACINUV   | 165.308   | 2.233   |
| ACIPOR   | 169.383   | 2.237   |
| AMPHEB   | 141.292   | 2.181   |
| AMPHEB01 | 140.994   | 2.198   |
| AMPHEB02 | 174.041   | 2.022   |
| AMPHEB03 | 171.391   | 2.046   |
| BUWCAX   | 153.865   | 2.251   |
| BUWCAX   | 154.217   | 2.273   |
| CAVFOU   | 166.331   | 2.292   |
| FIZWOA01 | 162.169   | 2.196   |
| GOLDUG   | 162.694   | 2.276   |
| GOLDUG   | 150.285   | 2.293   |
| HENCIM   | 157.009   | 2.295   |
| HENCUY   | 151.727   | 2.284   |
| HENDAF   | 167.954   | 2.178   |
| HENDIN   | 170.383   | 2.212   |
| HENDOT   | 142.972   | 2.219   |
| HENDUZ   | 164.189   | 2.280   |
| HENFAH   | 172.703   | 2.254   |
| HENFAH   | 149.028   | 2.251   |
| HENFUB   | 137.581   | 2.271   |
| HENGEM   | 151.859   | 2.218   |
| HENGEM   | 158.245   | 2.142   |
| HENGEM   | 152.755   | 2.229   |
| KOVSIK   | 169.060   | 2.246   |
| QIJXUC   | 173.649   | 2.271   |
| ROHTIR   | 161.796   | 2.266   |
| ROHTIR   | 154.316   | 2.212   |
| ROHTIR   | 151.102   | 2.252   |
| SUVHAS   | 171.859   | 2.200   |
| ZOJFOT   | 166.206   | 2.197   |
| QEWSEQ   | 159.518   | 2.299   |
| SUQLOF   | 154.141   | 2.290   |
| SUQLOF   | 156.504   | 2.282   |
| SUQLOF   | 155.414   | 2.229   |
| SUQLUL   | 172.268   | 2.238   |

(ii)

|        | N-H...X/° | H...X/Å |
|--------|-----------|---------|
| DANKEI | 169.761   | 2.266   |
| GEBHIE | 160.004   | 2.173   |
| KOZCAD | 148.189   | 2.286   |
| NEBHUX | 137.270   | 2.296   |
| NOCNEY | 163.167   | 2.184   |
| NOKBAQ | 151.258   | 2.238   |
| RELSOQ | 149.619   | 2.218   |
| REQTEM | 167.109   | 2.230   |
| SIBNAS | 146.977   | 2.281   |
| WODCEX | 157.050   | 2.257   |
| XIHSIQ | 161.719   | 2.262   |
| XIHSIQ | 167.235   | 2.145   |
| YBAENI | 169.550   | 2.264   |
| ZAXBOP | 147.054   | 2.139   |
| ZTANPB | 166.595   | 2.258   |
